# Supplementary material for: Lead ethyl dithiocarbamates: efficient single-source precursors to PbS nanocubes
Source: PubMed Central journal article supplement (PMC6837187; doi:10.1098/rsos.190943), 2019-10-30
Supplement: rsos190943supp1.pdf [file rsos190943supp1.pdf]

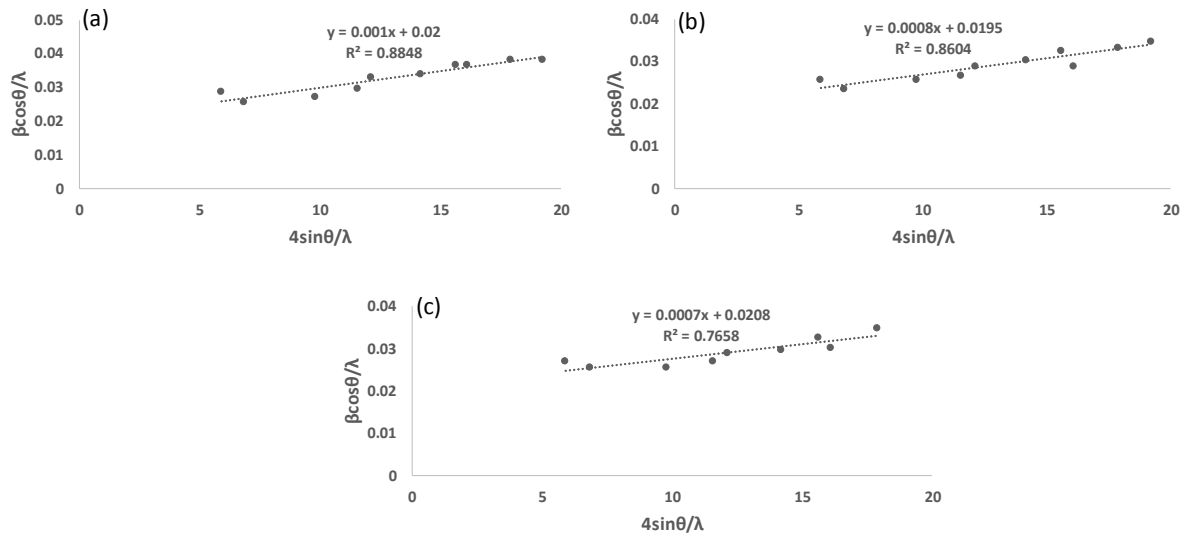

Figure 1: Williamson-Hall plots of PbS at (a) 250, 300, 400 °C
