# Supplementary material for: Lead ethyl dithiocarbamates: efficient single-source precursors to PbS nanocubes
Source: PubMed Central journal article supplement (PMC6837187; doi:10.1098/rsos.190943), 2019-10-30
Supplement: rsos190943supp2.pdf [file rsos190943supp2.pdf]

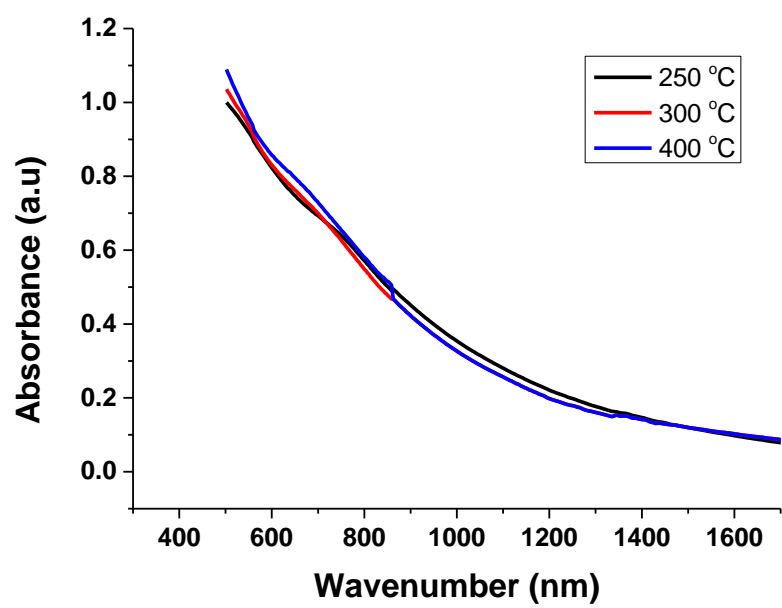

Figure 2: Uv-vis-nir of PbS at 250, 300, 400 °C
